# Supplementary material for: The Loobos ecosystem first tower dataset: meteorology, turbulent fluxes and net ecosystem exchange (1996 to 2021)
Source: Copernicus journal article supplement (doi:10.5194/essd-2025-372), 2025-09-01
Supplement: Supplementary file [file essd-2025-372-AC1-supplement.pdf]

## **# 1<sup>st</sup> Reviewer's comments**

Dear Reviewer,

We sincerely appreciate the time and effort you have devoted to reviewing our paper. Your constructive comments have been helpful in improving the quality of the paper. We have revised the manuscript accordingly and provided our detailed responses to your comments below.

Best regards

Hong, on behalf of all co-authors.

### **General comments.**

The manuscript “The Loobos ecosystem first tower dataset: meteorology, turbulent fluxes and net ecosystem exchange (1996 to 2021)” by Zhao et al. describes an impressive bulk of data collected over 25 years at one of the earliest micrometeorological towers installed in Europe for the systematic monitoring of CO<sub>2</sub> and energy fluxes. The dataset includes, beyond flux variables, numerous parallel measurements of biophysical parameters and biological processes of the forest ecosystem such as LAI, foliage chemistry, biomass carbon stocks, sap flow density and water table depth.

A dedicated section explains in detail the flux data processing pipeline and the quality check procedures for flux and partly for meteorological variables. Finally, a synthesis of the dataset is illustrated by plots showing the consistency of the flux data, the mean diurnal variation and in particular the mean monthly NEE fluxes from which the trend towards a stronger carbon sequestration can be observed.

The presented dataset is undoubtedly of interest to the readers of ESSD and the well-structured manuscript delivers an overall clear and detailed description of it. Said that, I recommend the publication of the manuscript but only after a minor revision mainly to: (i) fix some issues concerning the terminology used to describe the ecosystem-atmosphere CO<sub>2</sub> exchanges; (ii) provide more information about the quality of meteorological measurements and the instruments' maintenance routines.

### **Specific comments.**

Introduction section (ca. L60): I suggest including a map of the area showing the location of the measurements (eddy covariance, meteorological, forest transects, sap flow, etc.).

Reply: We thank the reviewer for this helpful suggestion. We have added a map into the text showing the locations of various measurements conducted at the first tower.

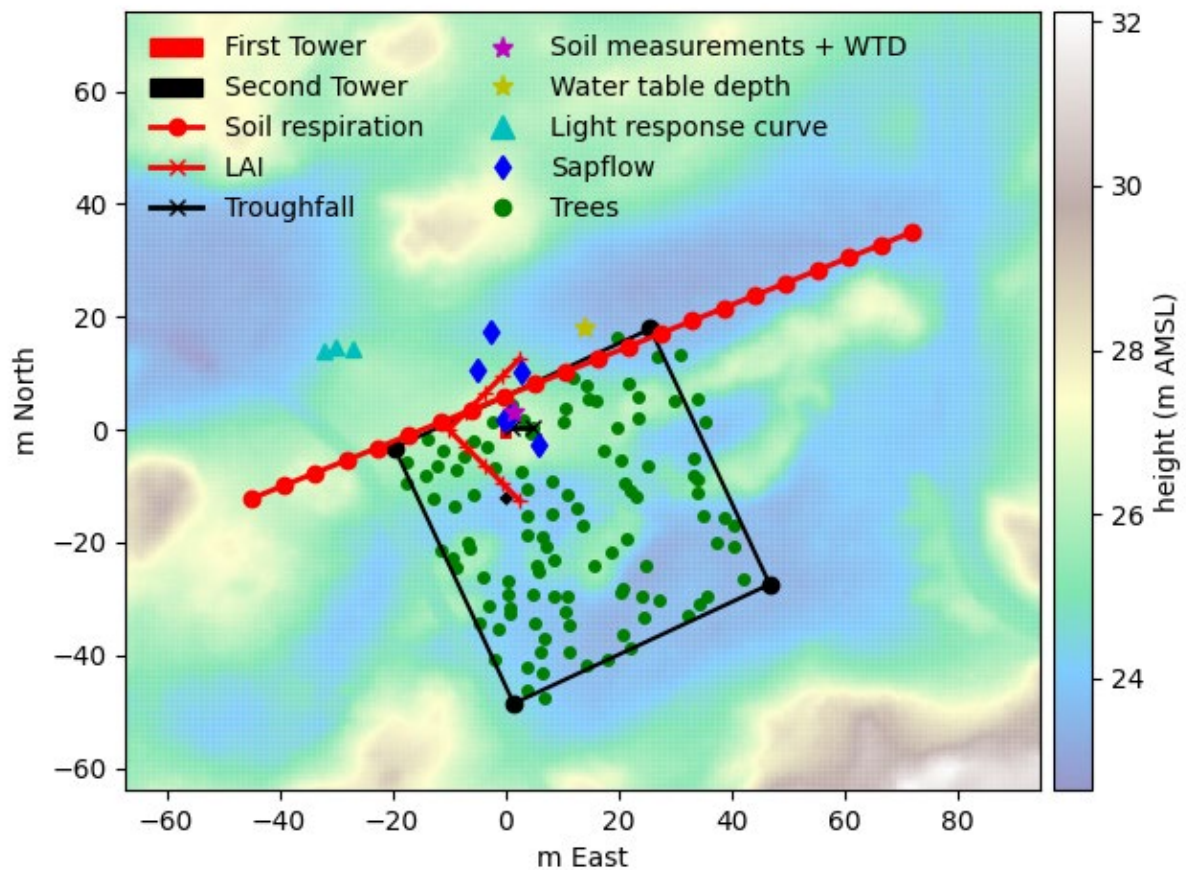

Figure 1 A map of measurement locations at the Loobos first tower. The first tower is in the center (0,0) m. The black square delineates the area where the tree inventories were done in 2000, 2005, 2008, 2012 and 2025. The green dots show the locations of the trees in the inventory.

Introduction – par 2.1.1: Some instruments were operated continuously for long periods of time (eg. pyranometers, quantum sensors, etc.). Report about the maintenance routine and its frequency to ensure accurate measurements, mentioning if the sensors were periodically calibrated and if the calibration drift was accounted for in processing the data.

Reply: We agree on the importance of sensor maintenance and calibrations. Indeed, we did sensor calibration for key instruments such as the gas analyzer sensors, and we also conducted the routine maintenance on a bi-weekly basis, including visual inspection, cleaning of sensor domes and diffusers of remote dust and other deposits and verification of sensor leveling and alignment. These manual interventions ensured optical and structural integrity, while the long-term consistency of the data was further supported by the high intrinsic stability of the sensors themselves.

**We have added the descriptions below to the last paragraph of 2.1.1.**

“Notably, the key instruments that operate continuously over long periods, such as pyranometers, Vaisala instruments and quantum sensors were maintained on a bi-weekly scale to ensure high-quality and reliable data. Routine maintenance includes visual inspection, cleaning of sensor domes and diffusers of remote dust and other deposits and verification of sensor leveling and alignment.

While these manual interventions ensured optical and structural integrity, the long-term consistency of the data was further supported by the high intrinsic stability of the sensors themselves. For instance, air temperature measurements through Vaisala remained highly stable due to inherent resistance to calibration drift from the platinum resistance thermometers (PT100). Similarly, soil moisture and temperature sensors (Campbell Scientific, Inc.) described in section 2.1.4 demonstrated high temporal stability with negligible sensor drift throughout the study period. While the Vaisala humidity sensors drifted, unfortunately, they were not often calibrated.

The sonic anemometers and wind vanes were characterized by high long-term stability, as their measurement accuracy is dependent on fixed transducer geometry rather than electronic calibration. Any potential measurement deviations were attributed to frame-induced flow distortions rather than transducer degradation; therefore, the anemometer did not require factory calibration.

Radiation sensors were subject to slow, systematic sensitivity degradation due to the environmental aging of the sensor's optical surfaces. To account for this, these instruments were returned for factory recalibration every couple of years. To assess the potential for long-term sensitivity degradation in the radiation measurements, an intercomparison was conducted during an overlapping period (from 2022-Jan-21 to 2023-May-29). Incoming shortwave radiation at the first tower was compared against a secondary, independent sensor (Kipp & Zonen) deployed at an adjacent site ((Van Der Molen et al., 2025), [https://meta.icos-cp.eu/resources/stations/ES\\_NL-Loo](https://meta.icos-cp.eu/resources/stations/ES_NL-Loo)). The comparison result demonstrates high instrumental consistency, with relative differences remaining within 5% when averaged over a weekly time window (Figure S1). As such, the calibration drift was not applied in the data processing. ”

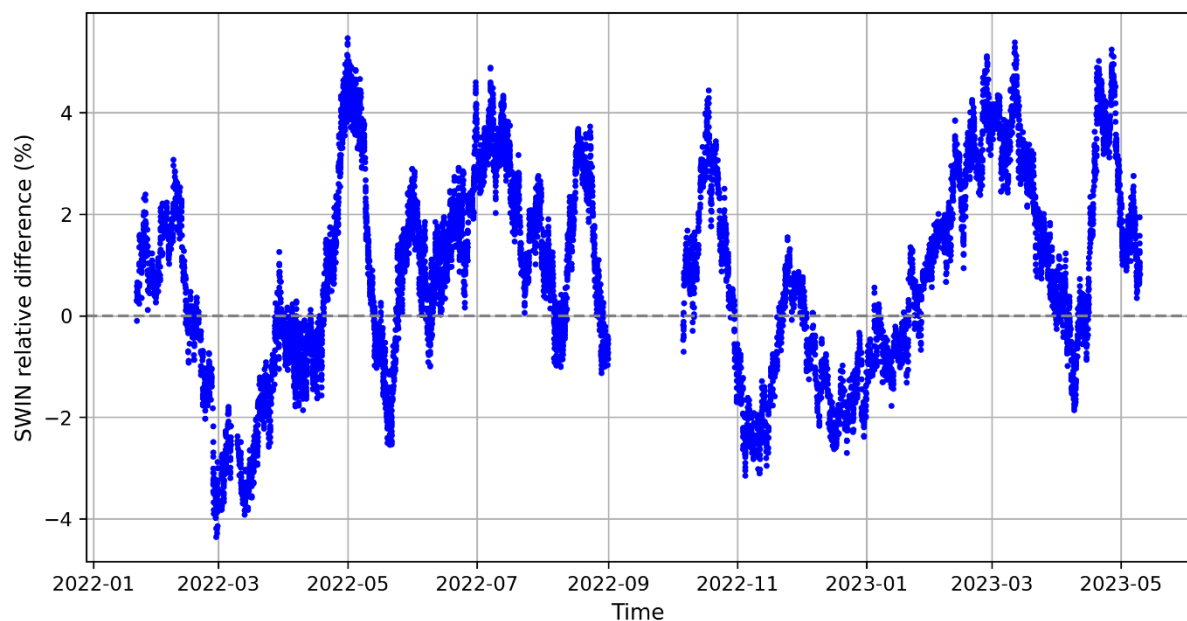

Figure S1 Relative difference of shortwave radiation measured from the first tower and the second tower.

**We have added the descriptions below to the last paragraph of 2.1.2.**

“Beyond these hardware transitions, the long-term continuity of the flux estimate was maintained through sensor-specific maintenance and calibration protocols designed to mitigate instrument drift.

For LI-COR infra-red gas analyser sensors, the closed-path LI-6262 was subjected to zero drift; this offset primarily affected absolute concentration values rather than EC flux calculations from high-frequency fluctuations. In contrast, the open-path LI-7500 series demonstrated high gain stability attributed to their robust optical design. Diurnal drift was assumed to be minimal and was further accounted for through standard coordinate rotation and detrending procedures during post-processing. These instruments were calibrated on an annual basis, supplemented by regular cleaning of optical windows to prevent signal attenuation from environmental debris. ”

L223: I guess that the “depth of 15 cm” refers to insertion of the collar into the soil and not to the depth of the chamber which would be placed on top of the collar. Please confirm.

Reply: Yes, that’s right. We revised it into “At each point, the collar was inserted into the soil with a depth of 15 cm and the soil respiration chamber was then placed onto the collar. ”

L444: the negative storage at sunrise should not be associated only to a “release of carbon dioxide” to the atmosphere, but also to the photosynthetic uptake of CO<sub>2</sub> by the vegetation below the eddy covariance sensors height.

Reply: We have revised it into “while the negative storage flux is largest around sunrise, indicating a release of carbon dioxides stored below the canopy at night. At the same time, plant photosynthetic uptake of CO<sub>2</sub> begins, partially offsetting this upward flux. ”

L460: fig. 8 shows mean monthly NEE, that is, by definition, the net flux resulting from the difference between the processes of photosynthesis and respiration. Therefore, in the case of this evergreen needle forest, I would not talk about a decrease of “winter respiration” but rather of the intensity of the CO<sub>2</sub> source.

Reply: We have revised “winter respiration” into “the CO<sub>2</sub> source”.

Appendix (L570-571): Replace “left photo” and “ right photo” with “photo on the right” and “photo on the left” respectively.

Reply: Done.
